# Supplementary material for: Phase-tunable synthesis and upconversion photoluminescence of rare-earth-doped sodium scandium fluoride nanocrystals
Source: Royal Society of Chemistry journal article supplement (doi:10.1039/c3ce40849c), 2013-01-01
Supplement: c3ce40849c.pdf [file c3ce40849c.pdf]

## Electronic Supporting Information

### **Phase-tunable synthesis and upconversion photoluminescence of rare-earth-doped sodium scandium fluoride nanocrystals**

Min Pang,<sup>a,b</sup> Jing Feng,<sup>a</sup> Shuyan Song,<sup>a</sup> Zhuo Wang<sup>a,b</sup> and Hongjie Zhang<sup>\*a</sup>

<sup>a</sup>State Key Laboratory of Rare Earth Resource Utilization, Changchun Institute of Applied Chemistry, Chinese Academy of Sciences, 5625 Renmin Street, Changchun 130022, China

<sup>b</sup>Graduate School of the Chinese Academy of Sciences, Beijing, 100039, China

\*Corresponding author

Email: hongjie@ciac.jl.cn (Hong-Jie Zhang)

Tel: 86-431-85262127.

Fax: 86-431-85698041.

## Experimental Section

### Chemicals and materials

All chemicals were of analytical grade and were used without further purification. Ethanol and cyclohexane were purchased from Sino-pharm Chemical Reagent Co., China.  $\text{Na}(\text{CF}_3\text{COO})$ ,  $\text{RE}_2\text{O}_3$ , oleic acid (OA), 1-octadecene (ODE) and oleylamine (OM) were purchased from Aladdin(China).  $\text{RE}(\text{CF}_3\text{COO})_3$  was prepared as reported.<sup>1</sup> Distilled water was used throughout.

### Synthesis of RE doped $\text{Na}_x\text{ScF}_{3+x}$ NCs

In the case of the preparation of  $\text{Na}_x\text{ScF}_{3+x}:\text{20\% Yb}^{3+}/\text{2\% Er}^{3+}$  NCs, 0.78 mmol  $\text{Sc}(\text{CF}_3\text{COO})_3$ , 0.2 mmol  $\text{Yb}(\text{CF}_3\text{COO})_3$ , 0.02 mmol  $\text{Er}(\text{CF}_3\text{COO})_3$  and stoichiometric amounts  $\text{Na}(\text{CF}_3\text{COO})$  were taken as the precursors and were added into 20 mL OA/OM/ODE in a three-necked flask at room temperature (RT). The obtained mixture was heated at 120 °C for 30 min under vigorous stirring in  $\text{N}_2$  atmosphere to form a transparent solution. Thereafter, the solution was then heated to a certain temperature in the range of 270-310 °C at a rate of 10 K  $\text{min}^{-1}$  and maintained at the given temperature for 30-60 min under  $\text{N}_2$  atmosphere. After cooling this to RT, the resulting NCs were precipitated by addition of ethanol, collected via centrifugation, washed with ethanol several times and then dried at 60 °C overnight. The products can be easily redispersed in various nonpolar organic solvents, such as hexane, toluene, and cyclohexane.

### Characterization

TEM and HRTEM measurements were carried out on an FEI transmission electron microscope at an operating voltage of 200 kV. The XRD measurement was performed on a Rigaku X-ray diffractometer with Cu-K $\alpha$  radiation. The upconversion spectra were obtained by using a 980 nm laser diode. The emission attributed to the transitions between 400 and 900 nm was dispersed by a triple grating monochromator (Spectra Pro-2758, Acton Research Corporation, USA) equipped with a Photo-multiplier (Hamamatsu R928). The fluorescence images and photographs were obtained by a Panasonic FS25 camera. All of the measurements were performed at room temperature.

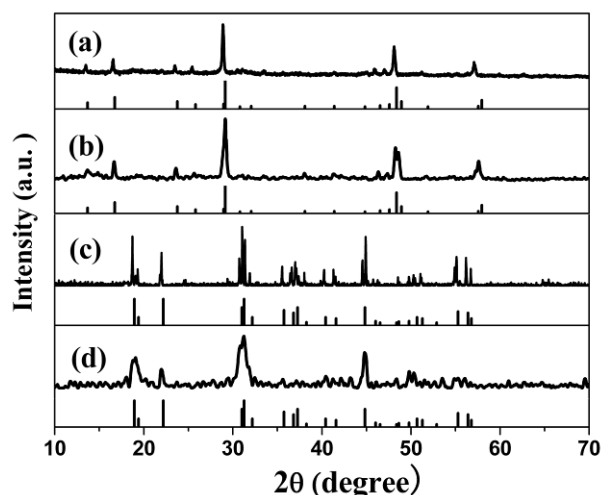

**Fig. S1** XRD patterns of the  $\text{Na}_x\text{ScF}_{3+x}:\text{Yb}^{3+}/\text{Er}^{3+}$  (20/2 mol %) NCs in the pure (a) (b) hexagonal, (c) (d) monoclinic phase and their corresponding standard peaks in the pure monoclinic and hexagonal phases, respectively. NCs obtained under (a) Na:Sc=1:1, OA/ODE (1:1) at 310 °C for 1h, (b) Na:Sc=1:1,OA/OM/ODE (1:2:2) at 310 °C for 1h, (c) Na:Sc=3:1, OA/ODE (1:1) at 310 °C for 1h and (d) Na:Sc=3:1,OA/OM/ODE (1:2:2) at 270 °C for 30 min.

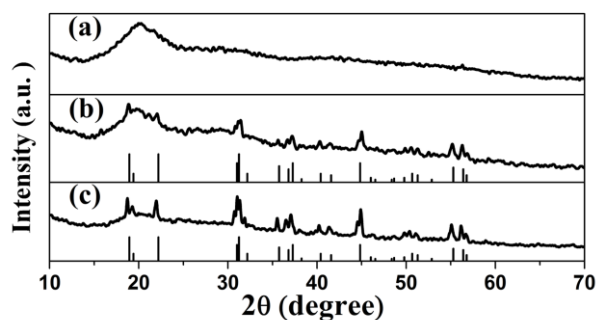

**Fig. S2** XRD patterns of the  $\text{Na}_x\text{ScF}_{3+x}:\text{Yb}^{3+}/\text{Er}^{3+}$  (20/2 mol %) NCs obtained under (a) Na:Sc=0.5:1, OA/ODE (1:1) at 300 °C for 1h, (b) Na:Sc=2:1,OA/ ODE (1:1) at 300 °C for 1h, (c) Na:Sc=4:1, OA/ODE (1:1) at 300 °C for 1h and their corresponding standard peaks in monoclinic phase.

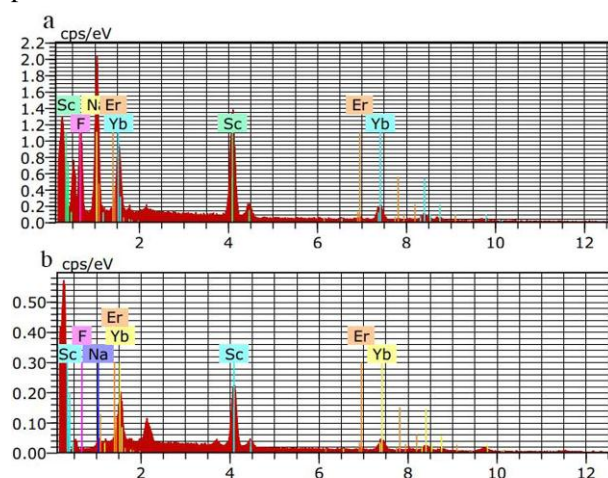

**Fig. S3** EDX spectra of (a)  $\text{Na}_3\text{ScF}_6:\text{Yb}^{3+}/\text{Er}^{3+}$  and (b)  $\text{NaScF}_4:\text{Yb}^{3+}/\text{Er}^{3+}$  NCs.

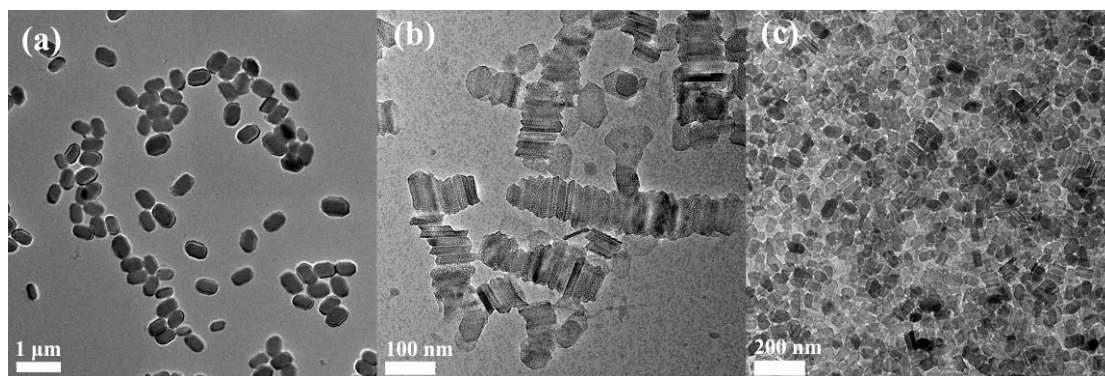

**Fig. S4** TEM images of  $\text{Na}_3\text{ScF}_6$  NCs obtained under (a) OA/ODE (1:1) at 310 °C for 1h, (b) OA/OM/ODE (1:2:2) at 300 °C for 1h and (c) OA/OM/ODE (1:2:2) at 310 °C for 1h.

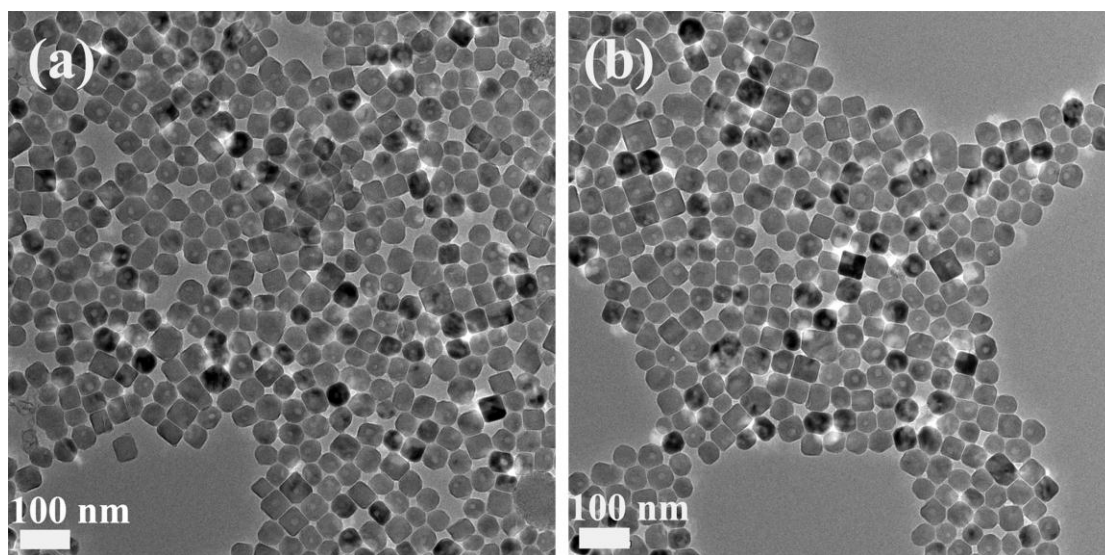

**Fig. S5** TEM images of  $\text{Yb}^{3+}/\text{Er}^{3+}$ -doped  $\text{NaScF}_4$  (a) and  $\text{Na}_3\text{ScF}_6$  (b) NCs.

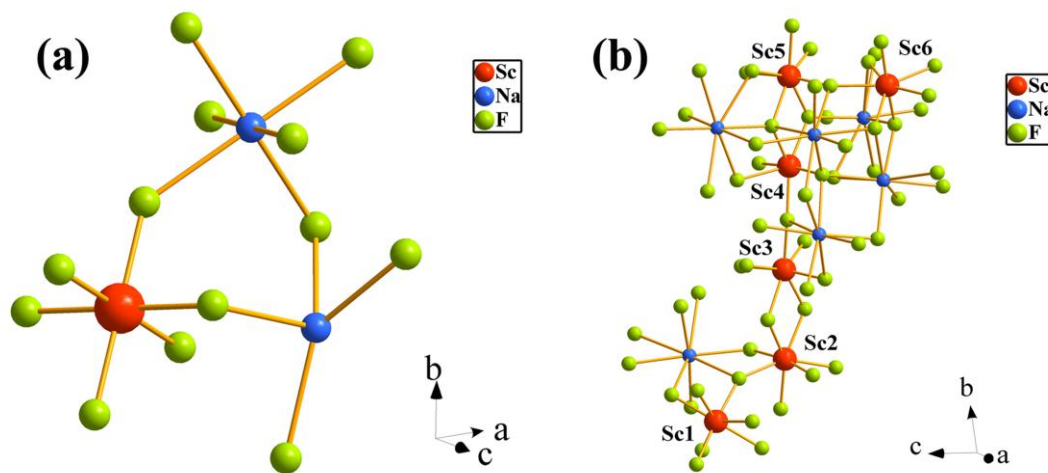

**Fig. S6** The coordination environments of crystallographically unique Sc atoms in the asymmetric unit of monoclinic-phase  $\text{Na}_3\text{ScF}_6$  (a) and hexagonal-phase  $\text{NaScF}_4$  (b).

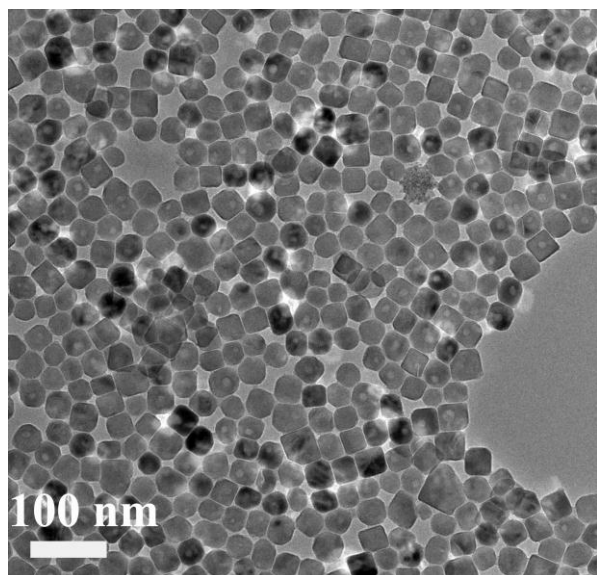

**Fig. S7** TEM images of NaScF<sub>4</sub>: Yb<sup>3+</sup>/Er<sup>3+</sup> (18/2 mol%) NCs.

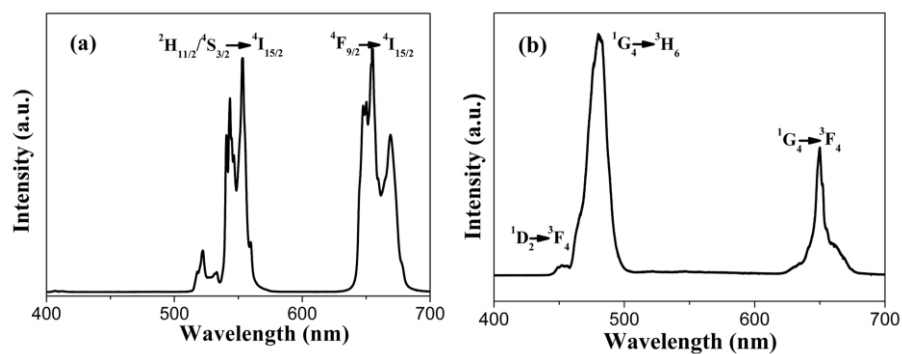

**Fig. S8** UC luminescence spectra of hexagonal-phase (a) NaScF<sub>4</sub>:Yb<sup>3+</sup>/Er<sup>3+</sup> (18/2 mol%) and (b) NaScF<sub>4</sub>:Yb<sup>3+</sup>/Tm<sup>3+</sup> (18/0.2 mol%) NCs.

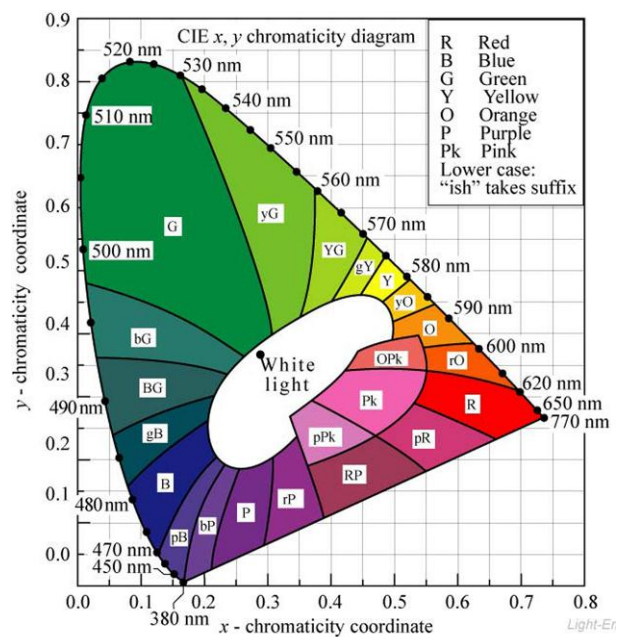

**Fig. S9** The CIE color coordinate diagram for the white light luminescence when  $r = 10:5$ .



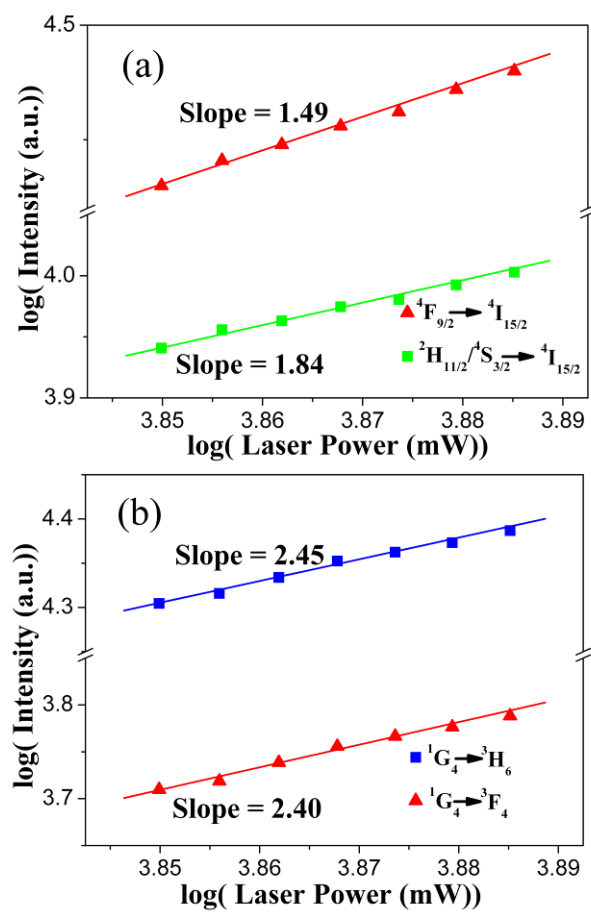

**Fig. S10** Log-log plots of the UC emission intensity versus NIR excitation power density for (a)  $\text{NaScF}_4:\text{Yb}^{3+}/\text{Er}^{3+}$  and (b)  $\text{NaScF}_4:\text{Yb}^{3+}/\text{Tm}^{3+}$  NCs.

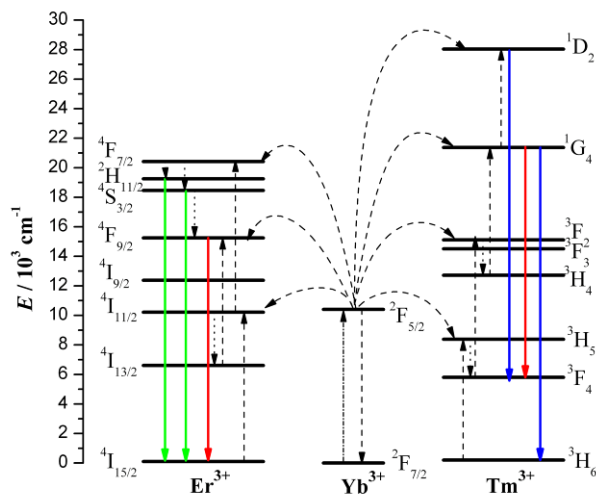

**Fig. S11** UC energy transfer mechanisms of the as-prepared NCs.

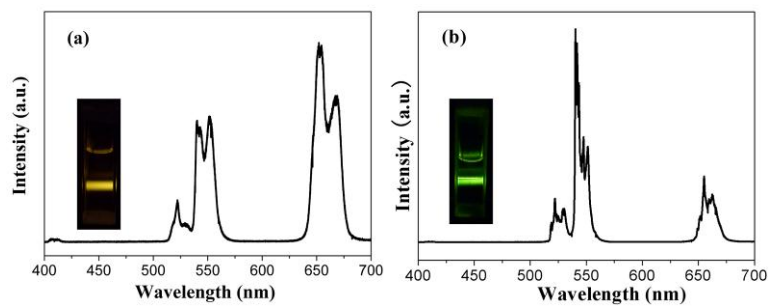

**Fig. S12** UC luminescence spectra of hexagonal-phase (a)  $\text{NaScF}_4:\text{Yb}^{3+}/\text{Er}^{3+}$  and (b)  $\text{NaYF}_4:\text{Yb}^{3+}/\text{Er}^{3+}$  nanocrystals. The insets show corresponding PL photographs of nanoparticles dispersed in cyclohexane.

## References

- 1 J. E. Roberts, *J. Am. Chem. Soc.*, 1961, **83**, 1087
